# Supplementary material
Source: publisher figshare collection journal article supplement (https://gsajournals.figshare.com/articles/dataset/_/11894592)
Supplement: Supplementary file 1 [file 2]

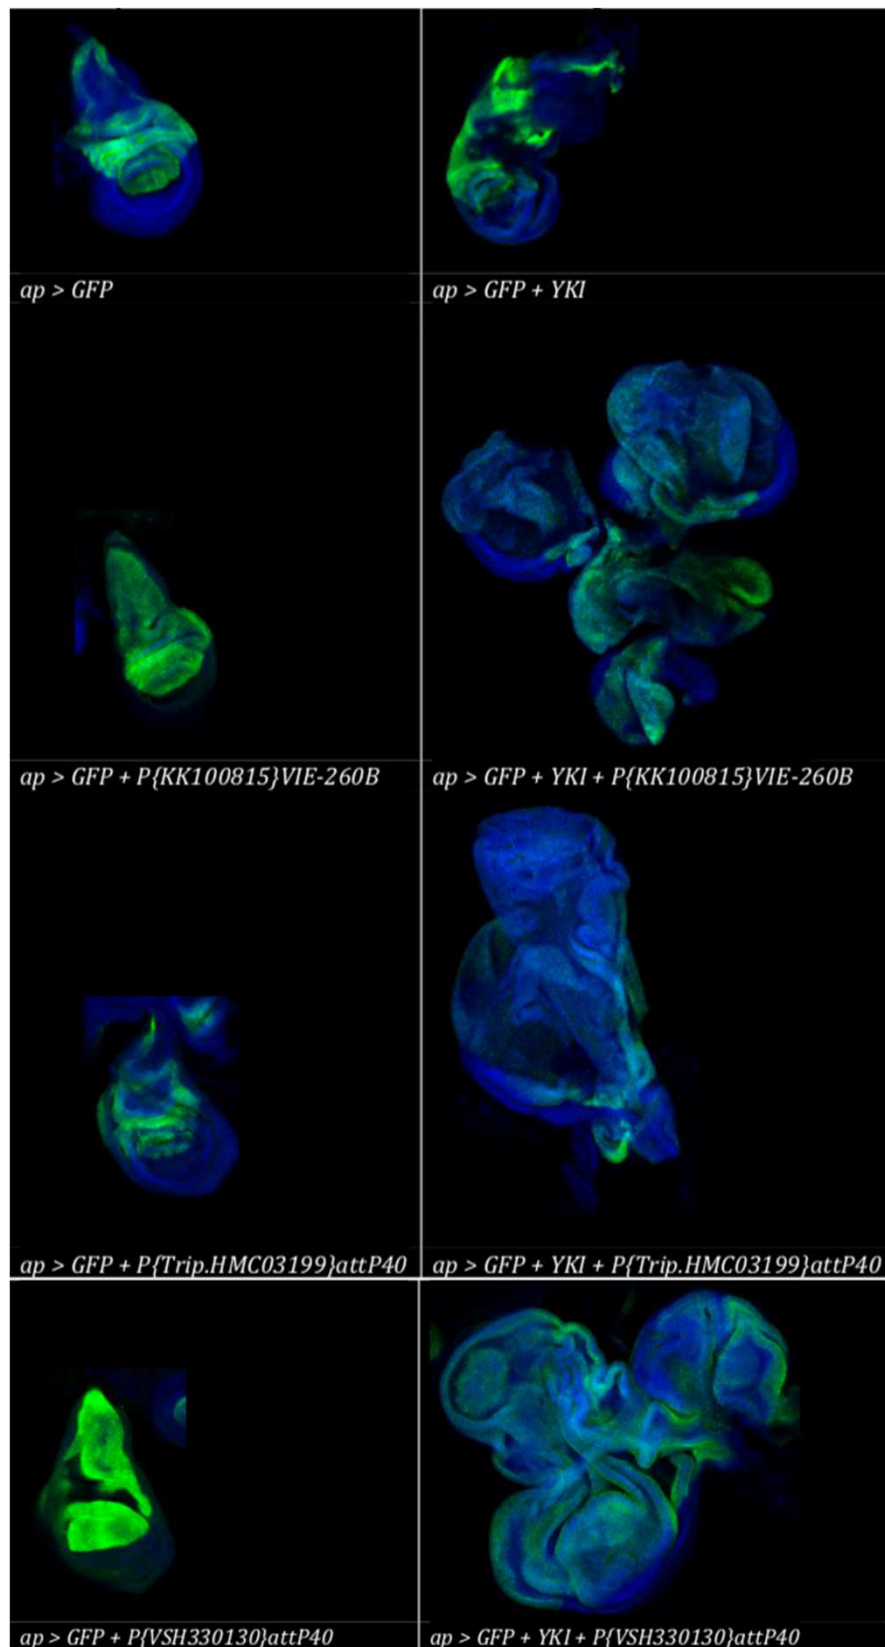

**Supplementary Figure S1: Different *RhoBTB* RNAi-lines develop massive tissue overgrowth in a tissue overexpressing YKI.**

Imaginal wing disks dissected from control flies and those expressing RNAi targeting YKI. The expression domain of the YKI and the RNAi transgenes is labeled by GFP. Different RNAi lines cause tissue overgrowth.
