# Supplementary material
Source: publisher figshare collection journal article supplement (https://gsajournals.figshare.com/articles/dataset/_/11894592)
Supplement: Supplementary file 2 [file 2]

| <b>Gene</b> | <b>Primer sequences for qPCR to assess transcript levels</b> |
|-------------|--------------------------------------------------------------|
| RhoBTB1     | Forward: ATGGACGCTGACATGGACTAC                               |
|             | Reverse: ATCCCGAGAACGCTCCAAGA                                |
| RhoBTB2     | Forward: TGGTCTCTACGTTTGGCCTT                                |
|             | Reverse: CGTGCTCAGCAGGAAGAGAT                                |
| YAP         | Forward:GCAACTCCAACCAGCAGCAACA                               |
|             | Reverse:CGCAGCCTCTCCTTCTCCATCTG                              |
| CTGF        | Forward:TAGGCTTGGAGATTTTGGGA                                 |
|             | Reverse:GGTTACCAATGACAACGCCT                                 |
| AREG        | Forward: CGAACCACAAATACCTGGCTA                               |
|             | Reverse:TCCATTTTTGCCTCCCTTTT                                 |
| GAPDH       | Forward: ACATCAAGAAGGTGGTGAAGCAG                             |
|             | Reverse: CAAAGGTGGAGGAGTGGGTGTC                              |
|             | <b>RhoBTB2 shRNA target sequences</b>                        |
| sh1         | GCACCAACTACAACAACGT                                          |
| sh2         | GCCCATCAAACCTAATGAA                                          |
| sh3         | GGTGGTGTTCCTACACA                                            |

Supplementary table T1: shRNA and qPCR primer sequences
