# Supplementary material
Source: publisher figshare collection journal article supplement (https://gsajournals.figshare.com/articles/dataset/_/11894592)
Supplement: Supplementary file 4 [file 2]

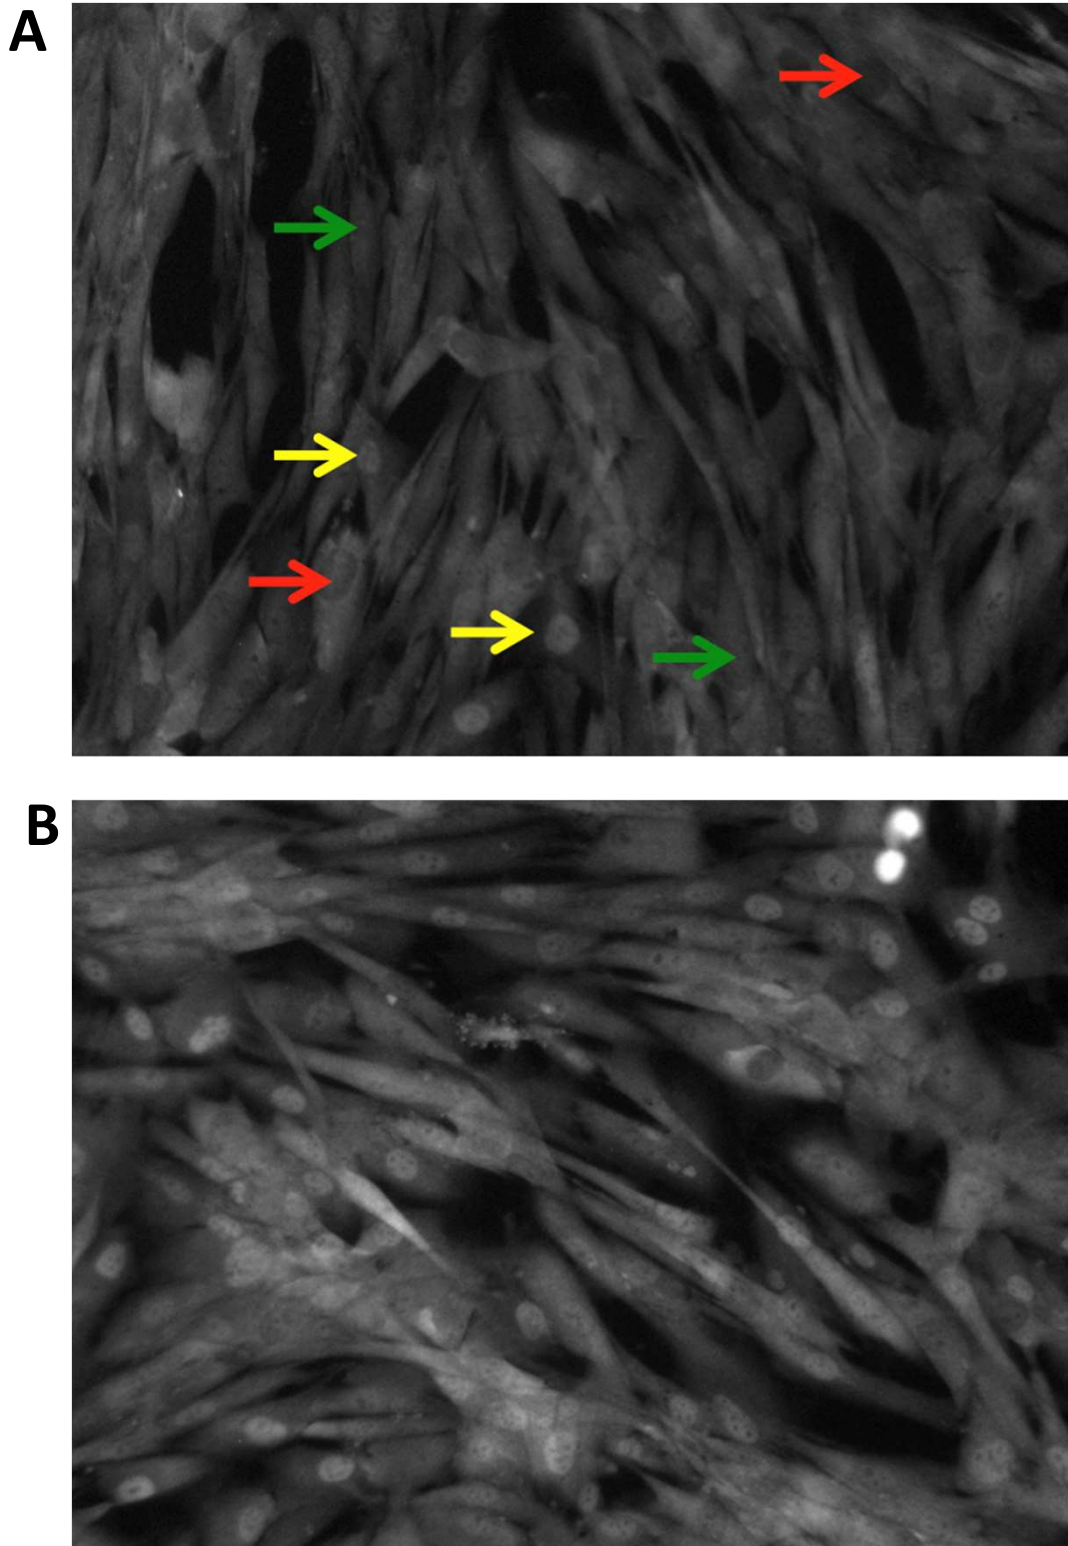

**Supplementary Figure S2: RhoBTB2 depletion increases nuclear YAP localization.**

Cells were treated with a scrambled siRNA (**A**) or a RhoBTB2-specific siRNA (**B**) and then stained for YAP. Cells were then scored for YAP localization as predominantly cytoplasmic (red arrows), evenly distributed between cytoplasm and nucleus (green arrows) or predominantly nuclear (yellow arrows).
